# Supplementary material for: Unveiling the environmental costs of lignocellulosic film production with ionic liquids: the case of 1-ethyl-3-methylimidazolium acetate
Source: Royal Society of Chemistry journal article supplement (doi:10.1039/d5su00212e), 2025-01-01
Supplement: d5su00212e1.pdf [file d5su00212e1.pdf]

**Supplementary material to “Unveiling the environmental costs of lignocellulosic film production with ionic liquids: The case of 1-ethyl-3-methylimidazolium acetate.”**

Diego Freire Ordóñez,<sup>\*a</sup> Antonella Rozaria Nefeli Pontillo,<sup>b</sup> Niall Mac Dowell,<sup>c</sup> Tom Welton,<sup>d</sup> and Koon-Yang Lee<sup>\*b</sup>

---

<sup>a.</sup> Department of Chemical Engineering, Imperial College London, London, UK.

<sup>b.</sup> Department of Aeronautics, Imperial College London, London, UK.

<sup>c.</sup> Centre for Environmental Policy, Imperial College London, UK.

<sup>d.</sup> Department of Chemistry, Imperial College London, London, UK.

**\* E-mail: [koonyang.lee@imperial.ac.uk](mailto:koonyang.lee@imperial.ac.uk)**

---

**Contents**

|                                                                                                              |   |
|--------------------------------------------------------------------------------------------------------------|---|
| Supplementary information S1: LCA inventories.....                                                           | 2 |
| Supplementary information S2: LCA comparison of produced lignocellulose film and commercial cellophane ..... | 4 |
| References .....                                                                                             | 5 |

---

## Supplementary information S1: LCA inventories

**Table S1-1. Inventory data of the foreground production system. 1-ethyl-3-methylimidazolium acetate (ionic liquid).**

| Products                                                 | Amount        | Unit        |
|----------------------------------------------------------|---------------|-------------|
| <i>Outputs to technosphere: Products and co-products</i> |               |             |
| 1-ethyl-3-methylimidazolium acetate                      | 1.00          | kg          |
| <b>Inputs</b>                                            | <b>Amount</b> | <b>Unit</b> |
| <i>Inputs from technosphere: materials/fuels</i>         |               |             |
| Dimethyl carbonate                                       | 0.53          | kg          |
| Acetic acid, 98% solution state                          | 0.09          | kg          |
| 1-ethylimidazole <sup>1</sup>                            | 0.57          | kg          |
| <i>Inputs from technosphere: electricity/heat</i>        |               |             |
| Electricity, high voltage                                | 0.19          | kWh         |
| Heat, district or industrial, natural gas                | 6.20          | MJ          |
| <b>Outputs</b>                                           | <b>Amount</b> | <b>Unit</b> |
| <i>Emissions to air</i>                                  |               |             |
| Carbon dioxide, process                                  | 0.13          | kg          |
| <i>Outputs to technosphere: Waste treatment</i>          |               |             |
| Wastewater                                               | 0.05          | kg          |

**Table S1-2. Inventory data of the foreground production system. Dope solution.**

| Products                                                 | Amount        | Unit        |
|----------------------------------------------------------|---------------|-------------|
| <i>Outputs to technosphere: Products and co-products</i> |               |             |
| Dope solution                                            | 1.00          | kg          |
| <b>Inputs</b>                                            | <b>Amount</b> | <b>Unit</b> |
| <i>Inputs from technosphere: materials/fuels</i>         |               |             |
| Cellulose fibre                                          | 0.08          | kg          |
| Lignin <sup>2</sup>                                      | 0.01          | kg          |
| Dimethyl sulfoxide                                       | 0.21          | kg          |
| 1-ethyl-3-methylimidazolium acetate                      | 0.70          | kg          |
| <i>Inputs from technosphere: electricity/heat</i>        |               |             |
| Electricity, high voltage                                | 1.58          | kWh         |
| <b>Outputs</b>                                           | <b>Amount</b> | <b>Unit</b> |
| <i>Outputs to technosphere: Waste treatment</i>          |               |             |
| Wastewater                                               | 0.05          | kg          |

**Table S1-3. Inventory data of the foreground production system. Lignocellulose film.**

| <b>Products</b>                                          | <b>Amount</b> | <b>Unit</b> |
|----------------------------------------------------------|---------------|-------------|
| <u>Outputs to technosphere: Products and co-products</u> |               |             |
| Lignocellulosic film                                     | 1.00          | kg          |
| <u>Outputs to technosphere: Products and co-products</u> |               |             |
| 1-ethyl-3-methylimidazolium acetate                      | 8.06          | kg          |
| Dimethyl sulfoxide                                       | 2.41          | kg          |
| <b>Inputs</b>                                            | <b>Amount</b> | <b>Unit</b> |
| <u>Inputs from technosphere: materials/fuels</u>         |               |             |
| Dope solution                                            | 11.49         | kg          |
| Water, deionised                                         | 1137.95       | kg          |
| <u>Inputs from technosphere: electricity/heat</u>        |               |             |
| Electricity, high voltage                                | 568.51        | kWh         |
| <b>Outputs</b>                                           | <b>Amount</b> | <b>Unit</b> |
| <u>Outputs to technosphere: Waste treatment</u>          |               |             |
| Wastewater                                               | 1137.95       | kg          |

**Supplementary information S2: LCA comparison of produced lignocellulose film and commercial cellophane**

**Table S2-1. LCA results. Lignocellulose thin film vs Cellophane production.**

| <b>Impact Category</b>                                                         | <b><i>Lignocellulose film</i></b>        | <b><i>Cellophane</i><sup>3</sup></b>                |
|--------------------------------------------------------------------------------|------------------------------------------|-----------------------------------------------------|
| GWP                                                                            | 183 kg CO <sub>2</sub> eq/kg film        | 5.94 kg CO <sub>2</sub> eq/kg film*                 |
| Human Health                                                                   | $2.94 \times 10^{-4}$ DALY/kg film       | $8.02 \times 10^{-6}$ DALY/kg film*                 |
| Ecosystem Quality                                                              | $8.08 \times 10^{-7}$ species.yr/kg film | $2.99 \times 10^{-8}$ species.yr/kg film*           |
| Resource Scarcity                                                              | 20.3 USD <sub>2013</sub> /kg film        | $2.62 \times 10^{-4}$ USD <sub>2013</sub> /kg film* |
| * Assuming a unit weight of 36.9 g m <sup>2</sup> of cellophane <sup>4</sup> . |                                          |                                                     |

## References

1. R. M. Cuéllar-Franca, P. García-Gutiérrez, J. P. Hallett and N. Mac Dowell, *React. Chem. Eng.*, 2021, **6**, 258.
2. C. Moretti, B. Corona, R. Hoefnagels, M. van Veen, I. Vural-Gürsel, T. Strating, R. Gosselink and M. Junginger, *Sci Total Environ*, 2022, **806**, 150316.
3. Cellophane. <https://www.globalcadataaccess.org/cellophane>, (last accessed July 2024).
4. Yield and Unit Weight. <https://www.polyprint.com/understanding-film-properties/flexographic-yield/>, (last accessed November 2024).
